# Supplementary material
Source: PubMed Central journal article supplement (PMC5336500)
Supplement: ajcr0007-0260-f7.pdf [file ajcr0007-0260-f7.pdf]

# HMGA2 promotes gastric cancer aggressiveness

## Supplementary Materials

Additional Supplementary Materials may be found online in the supporting information tab for this article:

Table S1 Details of antibodies used in this study.

**Table S1.** Antibodies used in this study

| Antibody                      | Catalog No. | Company                              |
|-------------------------------|-------------|--------------------------------------|
| Rabbit anti-HMGA2             | Ab166605    | Abcam, Cambridge, Massachusetts, USA |
| Rat anti-CD44                 | Ab119863    | Abcam, Cambridge, Massachusetts, USA |
| Rabbit anti-ALDH1             | Ab23375     | Abcam, Cambridge, Massachusetts, USA |
| Rabbit anti-c-Myc             | LS-B7576    | Lifespan, Seattle WA, USA            |
| Rabbit anti-Sox2              | GTX101507   | GeneTex, Irvine, CA, USA             |
| Goat anti-Oct4                | Sc-8629     | Santa cruz, Santa Cruz, CA, USA      |
| Rabbit anti-Snail             | Ab180714    | Abcam, Cambridge, Massachusetts, USA |
| Rabbit anti- $\beta$ -catenin | Ab-32572    | Abcam, Cambridge, Massachusetts, USA |
| Rabbit anti-GAPDH             | Sc-25778    | Santa cruz, Santa Cruz, CA, USA      |
